# Supplementary material
Source: PubMed Central journal article supplement (PMC3034158)
Supplement: NIHMS259873-supplement-Supp1.pdf [file NIHMS259873-supplement-Supp1.pdf]

**Supplemental on-line table.** Patients' characteristics and comparison of parameters that affect

hemorrhagic transformation

|                         | All            | Hemorrhagic transformation |                | P-value |
|-------------------------|----------------|----------------------------|----------------|---------|
|                         | n=93           | Yes, n=22                  | No, n=71       |         |
| Age, mean± SD           | 71.5±15.8      | 76.4±16.6                  | 70.0±15.3      | 0.098   |
| Sex (female) n (%)      | 58 (62.4)      | 16 (72.7)                  | 42 (59.2)      | 0.251   |
| Initial NIHSS score     | 14.0 [7, 21]   | 17 [10, 24]                | 13 [6, 18]     | 0.051   |
| Time to treatment, min  | 150 [120, 175] | 150 [120, 175]             | 150 [120, 170] | 0.58    |
| Risk factors            |                |                            |                |         |
| Hypertension            | 71 (76.3)      | 15 (81.8)                  | 53 (75.7)      | 0.552   |
| Diabetes                | 22 (23.7)      | 6 (27.3)                   | 16 (22.5)      | 0.648   |
| Hyperlipidemia          | 35 (37.6)      | 9 (40.9)                   | 26 (36.6)      | 0.717   |
| Atrial fibrillation     | 29 (31.2)      | 9 (40.9)                   | 20 (28.2)      | 0.260   |
| Coronary artery disease | 16 (17.2)      | 3 (13.6)                   | 14 (19.7)      | 0.753   |
| Past stroke History     | 17 (18.3)      | 2 (9.1)                    | 15 (29.6)      | 0.343   |
| Classification/Subtypes |                |                            |                |         |
| LCS                     | 23 (24.7)      | 3 (13.6)                   | 20 (28.2)      | 0.258   |

|                                |                |               |                |       |
|--------------------------------|----------------|---------------|----------------|-------|
| SPA infarct                    | 13 (14.0)      | 0             | 13 (19.7)      | 0.033 |
| Initial lab findings           |                |               |                |       |
| Systolic blood pressure, mmHg  | 163.5±23.0     | 170.7±22.3    | 161.1±23.0     | 0.094 |
| Diastolic blood pressure, mmHg | 84.9±15.1      | 83.1±14.1     | 85.4±15.5      | 0.539 |
| Serum glucose, mg/dL           | 111 [101, 135] | 109 [99, 140] | 112 [103, 132] | 0.668 |
| Hematocrit, %                  | 39.0±4.5       | 38.0±3.8      | 39.2±4.6       | 0.272 |
| White blood cell, ml           | 9,155±2,530    | 9,468±2,562   | 9,057±2,530    | 0.509 |
| Platelet, x10 <sup>3</sup> /μL | 232.3±74.2     | 229.8±45.5    | 233.1±81.3     | 0.856 |

LCS, lacunar clinical syndrome; SPA, single penetrator artery;

Values are mean±SD or number of patients (%) if not indicated; Values in square brackets represent inte
